# Supplementary material for: Title: Transcriptome and metabolome analyses reveal pathways associated with fruit color in plum (Prunus salicina Lindl.)
Source: Research Square preprint supplement (doi:10.21203/rs.3.rs-221659/v1), 2021-02-25
Supplement: Supplementary file 1 [file 414b53b43470a37c81d790e2.xlsx]

## Sheet: Sheet1
Table S2 Overview of sequencing data
Sample	RawData(bp)	BF_Q20(%)	BF_Q30(%)	BF_N(%)	BF_GC(%)	CleanData(bp)	AF_Q20(%)	AF_Q30(%)	AF_N(%)	AF_GC(%)
C1-1	8334662100	8142598695 (97.70%)	7790382887 (93.47%)	24288 (0.00%)	3951568262 (47.41%)	8288551056	0.9779	0.936	23702 (0.00%)	3927188320 (47.38%)
C1-2	9279654000	9032775914 (97.34%)	8594426099 (92.62%)	26247 (0.00%)	4359862220 (46.98%)	9231004449	0.9746	0.9277	25933 (0.00%)	4334020818 (46.95%)
C1-3	7130128200	6942226698 (97.36%)	6608301664 (92.68%)	19387 (0.00%)	3369990826 (47.26%)	7090390957	0.9748	0.9283	19071 (0.00%)	3348749985 (47.23%)
C2-1	8242473600	8058712044 (97.77%)	7708308084 (93.52%)	21671 (0.00%)	3961359160 (48.06%)	8202144925	0.9784	0.9361	21471 (0.00%)	3940163707 (48.04%)
C2-2	8169936900	7957508771 (97.40%)	7575262922 (92.72%)	22401 (0.00%)	3854953925 (47.18%)	8130330972	0.9749	0.9284	22226 (0.00%)	3834490365 (47.16%)
C2-3	8622764700	8402392733 (97.44%)	8003372026 (92.82%)	24075 (0.00%)	4060415144 (47.09%)	8583602653	0.9754	0.9294	23886 (0.00%)	4039876893 (47.07%)
C3-1	9353682900	9120379271 (97.51%)	8693960721 (92.95%)	25977 (0.00%)	4427457265 (47.33%)	9311112752	0.9759	0.9306	25700 (0.00%)	4405305844 (47.31%)
C3-2	10808772300	10539095776 (97.51%)	10044154050 (92.93%)	29867 (0.00%)	5101913537 (47.20%)	10759937756	0.9759	0.9303	29418 (0.00%)	5076518437 (47.18%)
C3-3	10191717600	9948173153 (97.61%)	9492734461 (93.14%)	27921 (0.00%)	4817333153 (47.27%)	10141268368	0.9769	0.9324	27531 (0.00%)	4790944835 (47.24%)
D1-1	9762759600	9529855608 (97.61%)	9110785369 (93.32%)	26663 (0.00%)	4627301767 (47.40%)	9704821534	0.9773	0.9347	26234 (0.00%)	4596715093 (47.37%)
D1-2	9078437400	8847827195 (97.46%)	8436377045 (92.93%)	24940 (0.00%)	4295462140 (47.31%)	9025489214	0.9757	0.9307	24619 (0.00%)	4267599430 (47.28%)
D1-3	10014940500	9759322229 (97.45%)	9305259899 (92.91%)	27260 (0.00%)	4719246938 (47.12%)	9965075426	0.9756	0.9306	26900 (0.00%)	4692904578 (47.09%)
D2-1	10970230800	10665043622 (97.22%)	10131592386 (92.36%)	29644 (0.00%)	5181278219 (47.23%)	10911430094	0.9733	0.925	29320 (0.00%)	5150212688 (47.20%)
D2-2	8112783300	7886931021 (97.22%)	7493480697 (92.37%)	21378 (0.00%)	3857529022 (47.55%)	8062427393	0.9733	0.9252	21078 (0.00%)	3830982302 (47.52%)
D2-3	9464680800	9228183077 (97.50%)	8806128833 (93.04%)	25511 (0.00%)	4453808535 (47.06%)	9417729416	0.9761	0.9318	25250 (0.00%)	4429527816 (47.03%)
D3-1	8814368400	8608084157 (97.66%)	8217286644 (93.23%)	36295 (0.00%)	4186254170 (47.49%)	8775535011	0.9773	0.9332	36126 (0.00%)	4165782784 (47.47%)
D3-2	8713737000	8501520551 (97.56%)	8109801147 (93.07%)	35725 (0.00%)	4128183152 (47.38%)	8668975304	0.9765	0.9318	35534 (0.00%)	4104637019 (47.35%)
D3-3	8363854500	8156428853 (97.52%)	7777979151 (93.00%)	23058 (0.00%)	3955661399 (47.29%)	8316386248	0.9762	0.9312	22788 (0.00%)	3931095153 (47.27%)
