# Supplementary material for: Title: Transcriptome and metabolome analyses reveal pathways associated with fruit color in plum (Prunus salicina Lindl.)
Source: Research Square preprint supplement (doi:10.21203/rs.3.rs-221659/v1), 2021-02-25
Supplement: Supplementary file 3 [file 1f92482ee95b50f6f5343c0b.docx]

**Article Title:**

Transcriptome and metabolome analyses reveal pathways associated with fruit color in plum (*Prunus salicina Lindl*.)

**Author list:**

Affiliations

Jilin Academy of Agricultural Sciences, Chang Chun, 130000,Chian

1. Lei Chen <chenleisofia@126.com>,
2. Xue-Song Wang <997974495@qq.com>,
3. Long Cui <331070480@qq.com>,
4. Yan-Bo Zhang (corresponding author) <zybjlgs@126.com>

Contributions

LC and YBZ conceived and designed the experiment. XSW and LongC prepared sampling and figures. LC drafted the manuscript with input from all authors. All authors read and approved the final version of the manuscript.


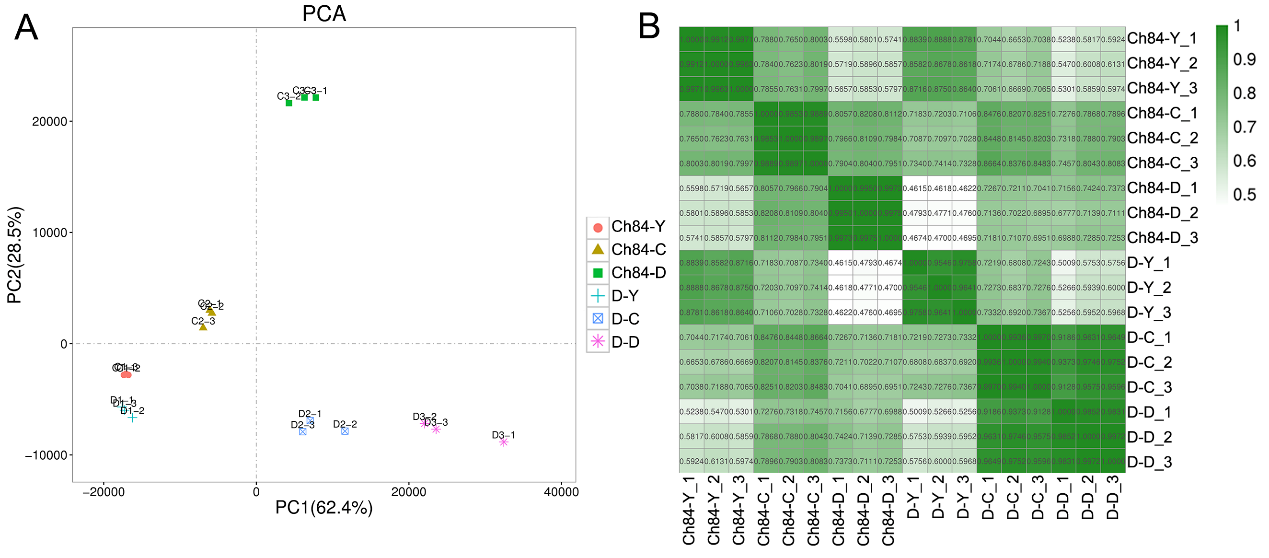


**Figure S1 Correlation between biological repeat samples by PCA and sample to sample correlation analysis.**

A, the geometry indicates the samples of different groups. B, heatmap of the inter-individual correlation of all mRNA transcripts. Ch84 is short for *Changli84*; D is short for *Dahuangganhe*.

| Table S1 Operation parameters |  |
| --- | --- |
| **Item** | **parameters** |
| ESI source temperature | 500°C |
| ion spray voltage (IS) | 5500 V |
| curtain gas (CUR) | 25psi |
| the collision-activated dissociation (CAD) | Highest |
| QQQ scans | MRM |
| The m/z range | 500~1000 |

| **Table S2** **Overview of sequencing data** |  |  |  |  |  |  |  |  |
| --- | --- | --- | --- | --- | --- | --- | --- | --- |
|  |  |  |  |  |  |  |  |  |
